# Supplementary material for: Evaluating the maintenance of disease-associated variation at the blood group-related gene B4galnt2 in house mice
Source: PubMed Central journal article supplement (PMC5557512; doi:10.1186/s12862-017-1035-7), 2017-08-14
Supplement: 12862_2017_1035_MOESM1_ESM.pdf [file 12862_2017_1035_MOESM1_ESM.pdf]

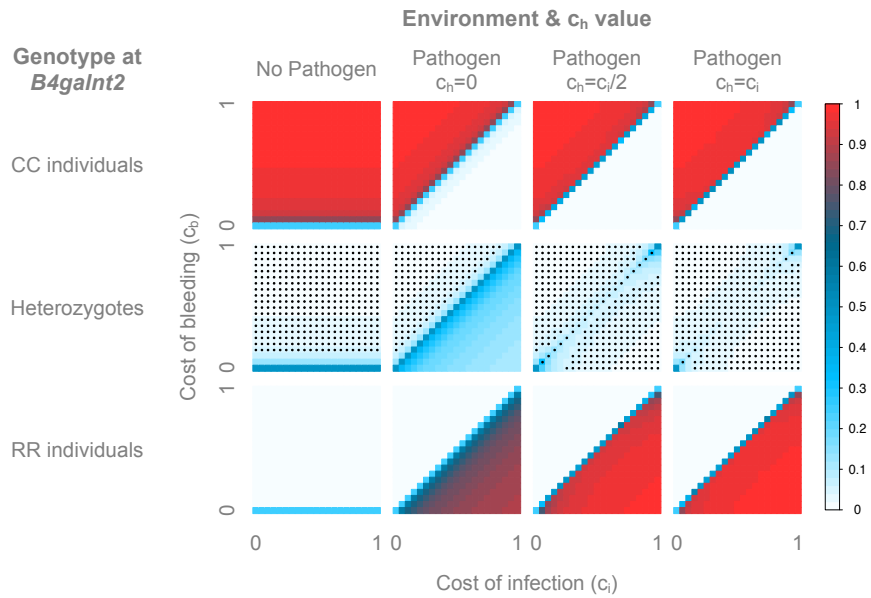

**Figure S1: Average genotype frequencies in the model with a constant environment.** The frequencies are displayed according to the cost of bleeding (y axis) and of infection (x axis). For the non-pathogenic environment (left panel), all  $c_h$  values are equivalent since  $c_i=c_h=0$  in all cases. For the pathogenic environment however, the different models of  $c_h$  values are shown. The average genotype frequencies across 100 simulations using the HWE-process, each with 10000 generations, are displayed. The frequencies are color-coded according to the legend on the right. Stars indicate an excess of heterozygotes.
